# Supplementary material
Source: Springer Nature journal article supplement (https://www.springermedizin.de/resource/supplementary/12916_2013_981_MOESM9_ESM.pdf/9598756)
Supplement: MOESM9 [file 9598756]

**Supplementary Table 9:** Global DNA methylation in human pancreatic islets. Average DNA methylation (%) in gene- and CpG-regions in human pancreatic islets treated for 48 h with control media or palmitate containing media.

| <b>Relation to gene region</b>       |                                             |                                               |                                  |                |                |
|--------------------------------------|---------------------------------------------|-----------------------------------------------|----------------------------------|----------------|----------------|
| <b>Region</b>                        | <b>Control mean <math>\pm</math> sd (%)</b> | <b>Palmitate mean <math>\pm</math> sd (%)</b> | <b>Diff. palmitate - control</b> | <b>P-value</b> | <b>q-value</b> |
| TSS1500                              | 27.2 $\pm$ 1.3                              | 27.9 $\pm$ 1.2                                | 0.8                              | 0.0032         | 0.0056         |
| TSS200                               | 12.2 $\pm$ 0.7                              | 12.4 $\pm$ 0.7                                | 0.2                              | 0.0767         | 0.0895         |
| 5'UTR                                | 22.7 $\pm$ 1.1                              | 23.3 $\pm$ 1.0                                | 0.6                              | 0.0151         | 0.0211         |
| 1stExon                              | 13.9 $\pm$ 0.9                              | 14.1 $\pm$ 0.8                                | 0.3                              | 0.0948         | 0.0948         |
| Body                                 | 59.7 $\pm$ 1.3                              | 60.7 $\pm$ 0.5                                | 1.0                              | 0.0011         | 0.0025         |
| 3'UTR                                | 70.7 $\pm$ 1.3                              | 71.8 $\pm$ 0.5                                | 1.0                              | 0.0003         | 0.0018         |
| Intergenic                           | 56.9 $\pm$ 1.4                              | 58.0 $\pm$ 0.8                                | 1.1                              | 0.0011         | 0.0025         |
| <b>Relation to CpG island region</b> |                                             |                                               |                                  |                |                |
| <b>Region</b>                        | <b>Control mean <math>\pm</math> sd (%)</b> | <b>Palmitate mean <math>\pm</math> sd (%)</b> | <b>Diff. palmitate - control</b> | <b>P-value</b> | <b>q-value</b> |
| N Shelf                              | 72.5 $\pm$ 1.3                              | 73.5 $\pm$ 0.6                                | 1.0                              | 0.0022         | 0.0026         |
| N Shore                              | 41.9 $\pm$ 1.5                              | 43.0 $\pm$ 1.1                                | 1.1                              | 0.0009         | 0.0026         |
| Island                               | 14.7 $\pm$ 0.8                              | 15.0 $\pm$ 0.7                                | 0.2                              | 0.1189         | 0.1189         |
| S Shore                              | 40.6 $\pm$ 1.5                              | 41.7 $\pm$ 1.1                                | 1.1                              | 0.0010         | 0.0026         |
| S Shelf                              | 73.1 $\pm$ 1.3                              | 74.1 $\pm$ 0.6                                | 1.0                              | 0.0022         | 0.0026         |
| Open Sea                             | 68.7 $\pm$ 1.3                              | 69.7 $\pm$ 0.6                                | 1.1                              | 0.0013         | 0.0026         |
